# Supplementary material
Source: publisher figshare collection journal article supplement (https://plos.figshare.com/articles/dataset/_/1639544)
Supplement: Supplementary file 1 [file 1]

Archive with 31 entries (31 files):
- S1_Fig.pdf
- S2_Fig.png
- S3_Fig.png
- S4_Fig.pdf
- S5_Fig.png
- S6_Fig.png
- S7_Fig.pdf
- S8_Fig.png
- S9_Fig.pdf
- S10_Fig.png
- S11_Fig.pdf
- S12_Fig.png
- S13_Fig.pdf
- S14_Fig.eps
- S15_Fig.pdf
- S16_Fig.pdf
- S1_Note.docx
- S1_Table.docx
- S2_Table.docx
- S3_Table.docx
- S4_Table.docx
- S5_Table.docx
- S6_Table.docx
- S7_Table.docx
- S8_Table.docx
- S9_Table.docx
- S10_Table.docx
- S11_Table.docx
- S12_Table.docx
- S13_Table.docx
- S14_Table.docx
