# Supplementary material
Source: publisher figshare collection journal article supplement (https://plos.figshare.com/articles/dataset/_/1639544)
Supplement: Supplementary file 1 [file 1 › S1_Fig.pdf]

## Sample Preparation:

(only one strand is shown, in the 5' to 3' direction)

Tripartite adapter is ligated to the end of the target molecule:

Ligated target – NNN CCTACACGACGCTCTCCGATCT NNNNNNNNNNNNNNNNNN CC AGGAATAGTTATGTGCATTAATGAATGG CGCC

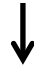

Target molecules with adapters at both ends are amplified and the PCR primer annealing region is removed:

Ligated target – NNN CCTACACGACGCTCTCCGATCT NNNNNNNNNNNNNNNNNN CC

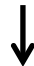

Amplified target molecules are fragmented and circularized:

Ligated target end – NNN CCTACACGACGCTCTCCGATCT NNNNNNNNNNNNNNNNNN CC – ligated region of interest

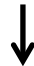

Circularized DNA is fragmented and fragments containing adapter sequences are prepared for sequencing:

Illumina adapter 1 – CCTACACGACGCTCTCCGATCT NNNNNNNNNNNNNNNNNN CC – ligated region of interest – Illumina adapter 2

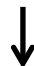

Resulting sequencing read:

NNNNNNNNNNNNNNNNNN CC – ligated region of interest

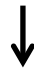

In computational pipeline, the sequences at the start of the read are used to determine the sample and target molecule of origin:

NNNNNNNNNNNNNNNNNN CC – ligated region of interest

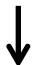

Determines target  
molecule of origin

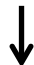

Confirms upstream  
sequence is a barcode

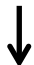

Contains sequence  
information
