# Supplementary material
Source: publisher figshare collection journal article supplement (https://plos.figshare.com/articles/dataset/_/1639544)
Supplement: Supplementary file 1 [file 1 › S1_Table.docx]

| **S1 Table.** Synthetic long read assembly statistics. | | | | |
| --- | --- | --- | --- | --- |
| Sample | Trimmed, filtered 2x150 bp read pairs | Synthetic reads > 1 kb | N50 length (kb) | Short-read bases per synthetic read basea | |
| *E. coli* MG1655 | 8,124,591 | 2,878 | 6.0 | 221.4 | |
| *G. sempervirens* | 112,289,622 | 149,447b | 3.9 | 75.8 | |
| *G. sempervirens* #2 | 10,019,885 | 28,574 | 2.8 | 43.6 | |
| *G. gallus* (chicken) | 103,601,271 | 125,203 | 2.0 | 113.3 | |
| *S. tuberosum* (potato)c | 2,789,741 | 1,528 | 3.3 | 188.9 | |
| Recombinant *E. coli* from evolution experiment (sum of 24 strains) | 201,717,764 | 87,395 | 4.0 | 224.7 | |
| HCT116 mRNA | 85,118,973 | 11,707 | 1.5 | N/A | |
| HepG2 mRNA | 43,827,058 | 6,640 | 1.6 | N/A | |
| HIV *env* mixture | 51,127,680 | 7,723d | 2.3 | N/A | |

aCalculated as (total short-read nucleotides) / (total nucleotides in synthetic reads > 1 kb). Not calculated for mRNA samples, where many synthetic reads were shorter than 1 kb due to RNA degradation and the natural length distribution of mammalian mRNA, or for the HIV sample, which was deliberately over-sequenced. Low-quality or adapter-sequence nucleotides trimmed from short reads were included, i.e., the numerator was (2*150*number of read pairs).

bOf these,111,054 synthetic reads longer than 1.5 kb with an N50 of 4.3 kb were used to scaffold the draft genome.

c100 bp were trimmed from the ends of these synthetic reads prior to alignment, yielding 1,411 reads > 1 kb with an N50 length of 3.1 kb.

dAdditional steps to remove duplicate synthetic reads reduced this number to 1,173.
