# Supplementary material
Source: publisher figshare collection journal article supplement (https://plos.figshare.com/articles/dataset/_/1639544)
Supplement: Supplementary file 1 [file 1 › S4_Table.docx]

**S4 Table.** Summary of synthetic reads used in the synthetic read scaffolded *G. sempervirens* assembly.

| Feature | Metric |
| --- | --- |
| Number of Reads | 111,054 |
| Total Read Size | 397.8 Mb |
| Estimated Genome Coverage | 1.3x |
| Maximum Read Length | 15,260 bp |
| Minimum Read Length | 1,500 bp |
| Average Read Length | 3,581 bp |
| Median Read Length | 3,257 bp |
