# Supplementary material
Source: publisher figshare collection journal article supplement (https://plos.figshare.com/articles/dataset/_/1639544)
Supplement: Supplementary file 1 [file 1 › S8_Table.docx]

**S8 Table.** Comparison of synthetic long read approaches for genome assembly and phasing.

|  |  | Metrics | |  |  |  |
| --- | --- | --- | --- | --- | --- | --- |
| Method | Ref. | Demonstrated N50 (kb) | Short-read bases per synthetic read base | Format | Single-tube  Multiplexing | Reagent cost per sample prepb |
| This work | This work | 6.0 | 43-225 | 1-2 tubes | Demonstrated | $65 |
| TruSeq Synthetic Long Readsa | 8, 13, 14 | 8.2 | 73-91 | 384-well plate | Incompatible | $848c |

aAlternately called Moleculo or LRseq.

bLabor is not included in the calculations. The per-sample cost for the method described in this work is calculated assuming multiplexing of 4 samples. Further multiplexing will further reduce the cost per sample.

cCost of Illumina TruSeq kit along with necessary reagents not supplied by the kit.
