# Supplementary material
Source: publisher figshare collection journal article supplement (https://plos.figshare.com/articles/dataset/_/1639544)
Supplement: Supplementary file 1 [file 1 › S9_Table.docx]

| **S9 Table.** Human mRNA splice variant analysis. | | | | |
| --- | --- | --- | --- | --- |
| Cell line | Total splicing junctions | Known splicing junctions | Partial novel splicing junctions (alternative 5’ or 3’) | Novel splicing junctions |
| HCT116 | 12,739 | 12,357 | 192 | 190 |
| HepG2 | 9,122 | 8840 | 129 | 153 |
