# Supplementary material
Source: publisher figshare collection journal article supplement (https://plos.figshare.com/articles/dataset/_/1639544)
Supplement: Supplementary file 1 [file 1 › S12_Table.docx]

**S12 Table.** Comparison of application categories enabled by different synthetic long read methods.

|  |  | Application category | | |
| --- | --- | --- | --- | --- |
| Method | Ref. | Genome assembly and phasing | Full-length mRNA splice variants | Phasing similar individuals (e.g. viruses) |
| This work | This work | Shown | Shown | Shown |
| BAsE-Seq | Hong et al. 2014 | Incompatible | Incompatible | Shown |
| TruSeq Synthetic Long Reads | Voskoboynik et al. 2013 | Shown | Possible | Incompatible |
