# Supplementary material
Source: publisher figshare collection journal article supplement (https://plos.figshare.com/articles/dataset/_/1639544)

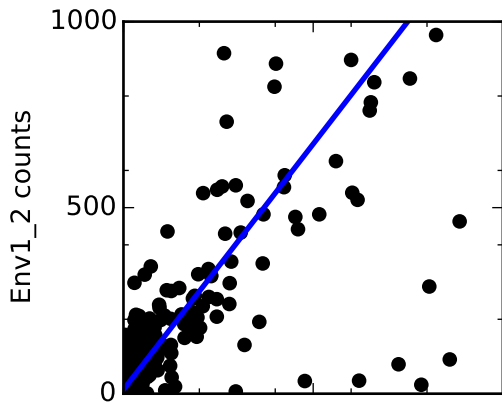

$\text{Env1\_2} = 11.06 + 1.32 \cdot \text{Env1\_1}$   
P-value < 0.000001  
 $R^2 = 0.887$

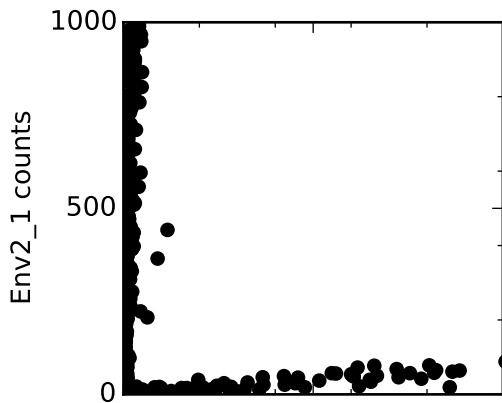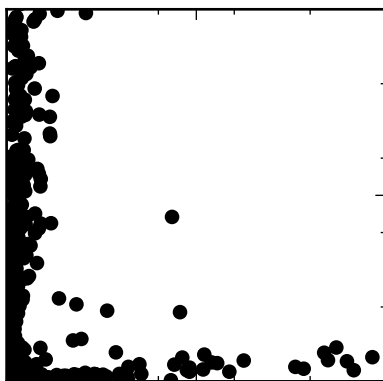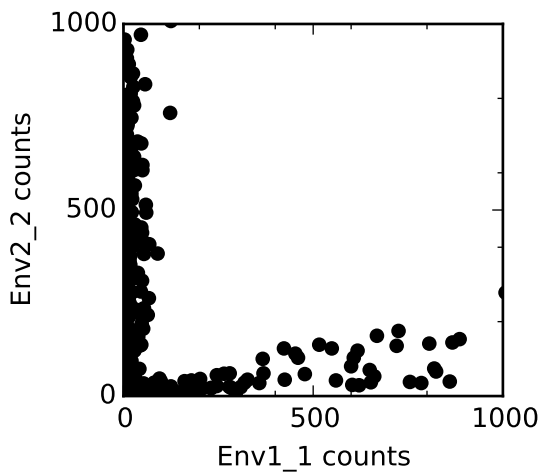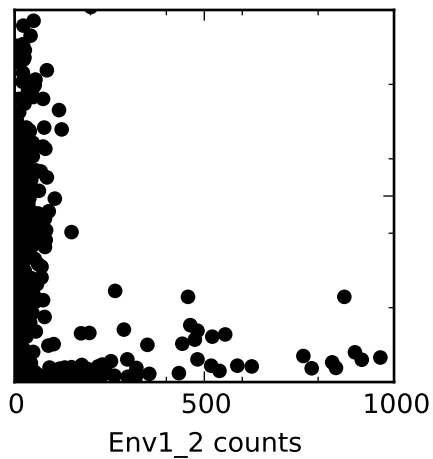

$\text{Env2\_2} = 152.23 + 1.24 \cdot \text{Env2\_1}$   
P-value < 0.000001  
 $R^2 = 0.312$

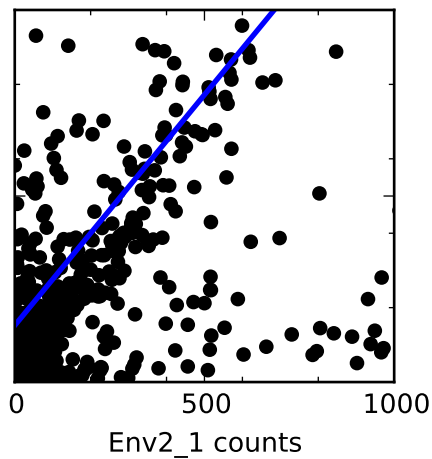

Supplement: Supplementary file [file 1]
