# Supplementary material
Source: publisher figshare collection journal article supplement (https://plos.figshare.com/articles/dataset/_/1639544)

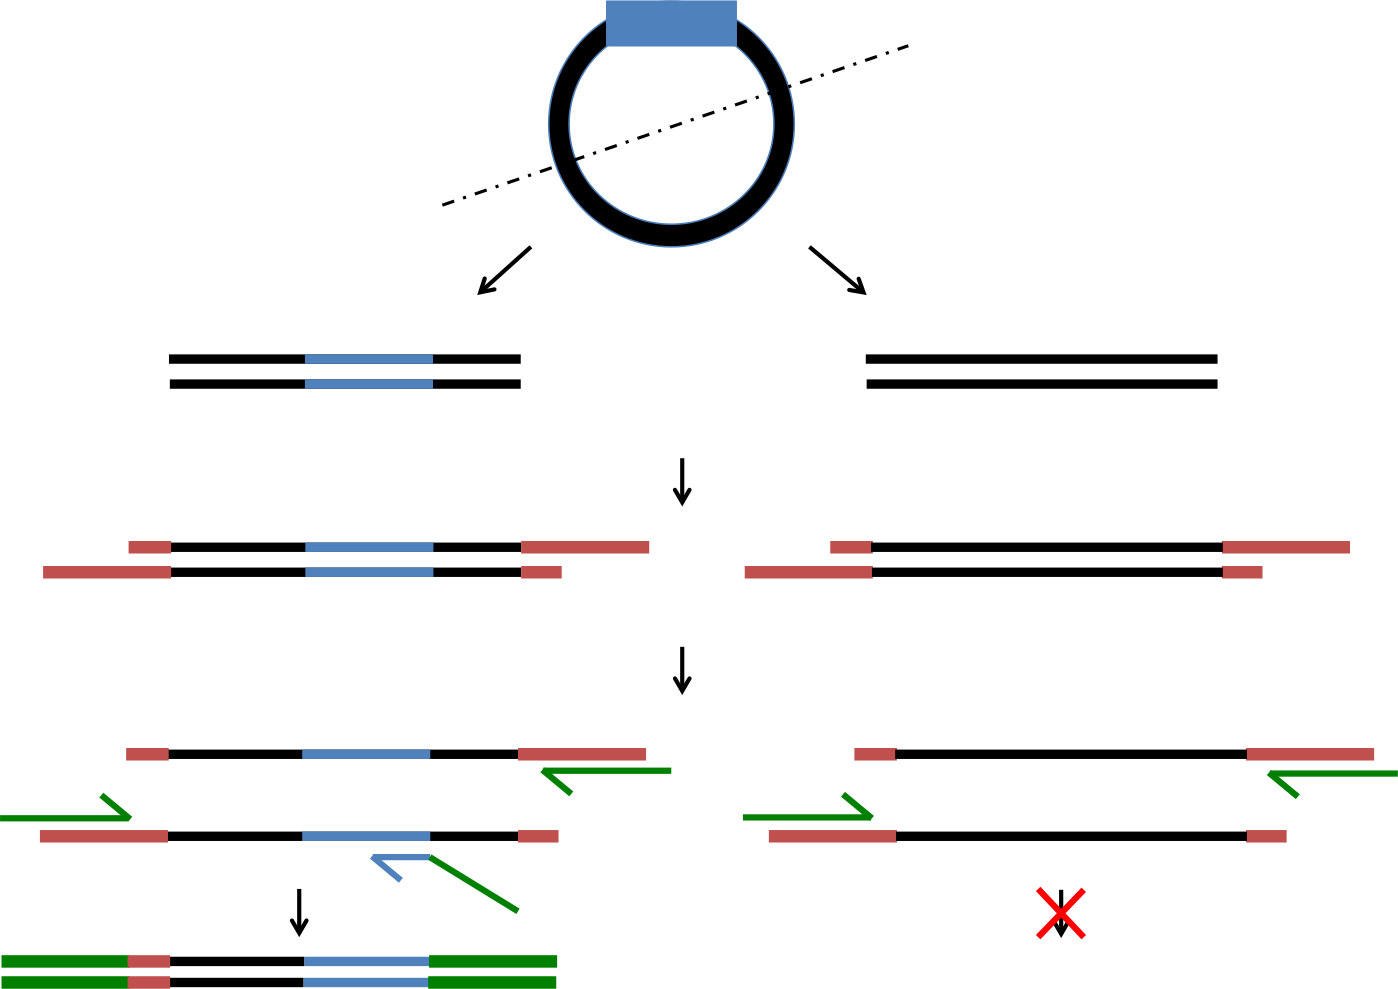

Supplement: Supplementary file 1 [file 1 › S2_Fig.png]

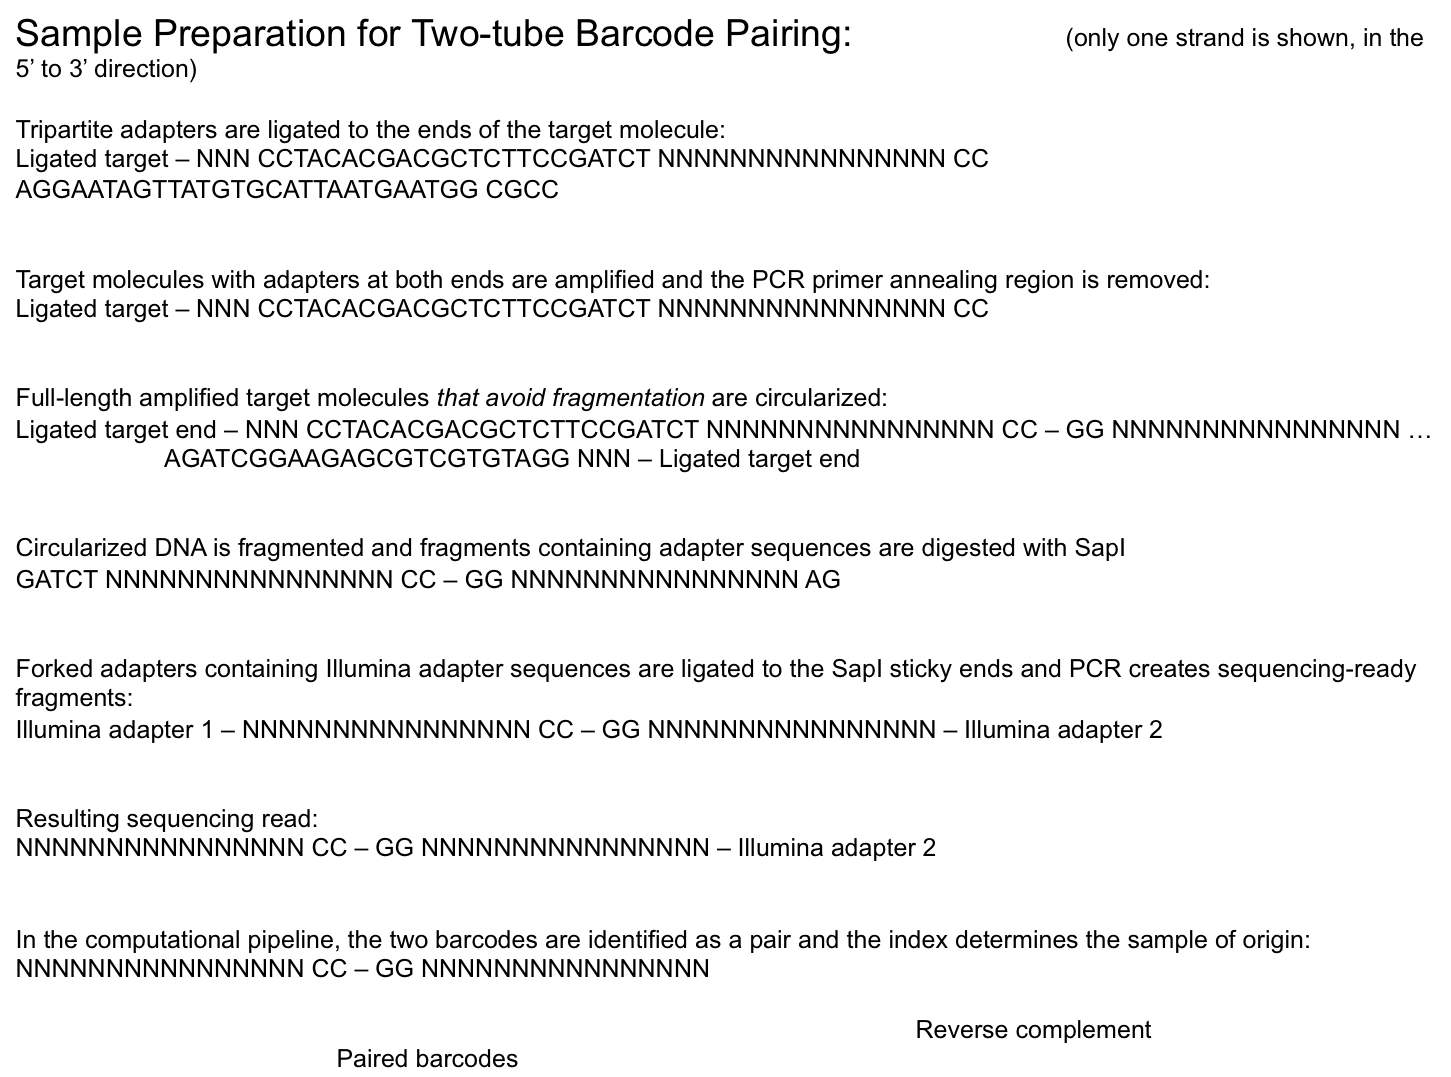

Supplement: Supplementary file 1 [file 1 › S3_Fig.png]

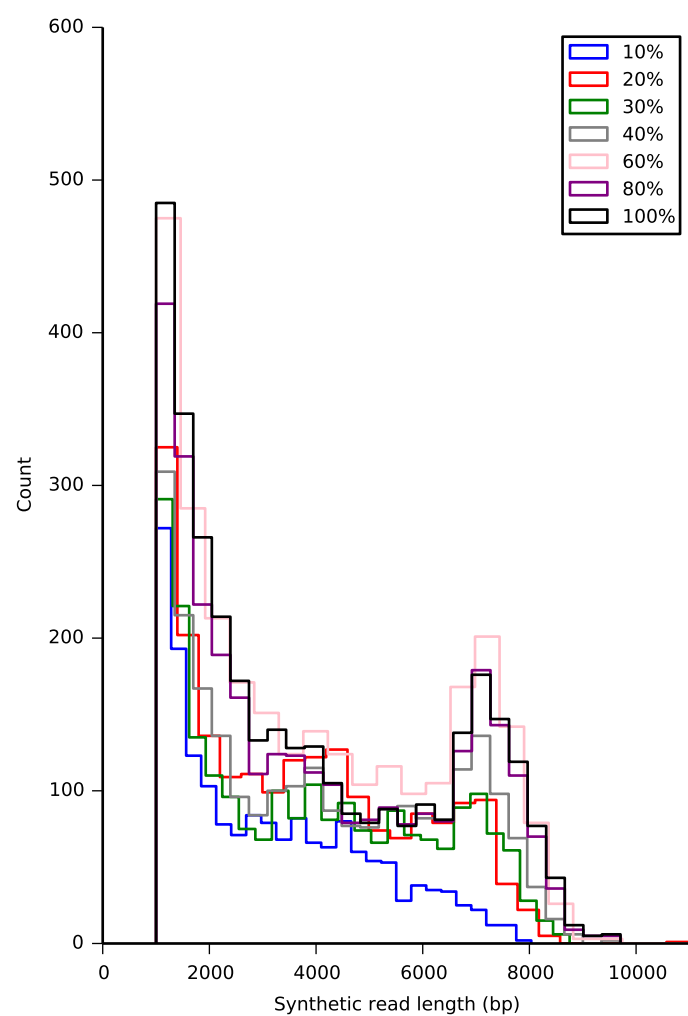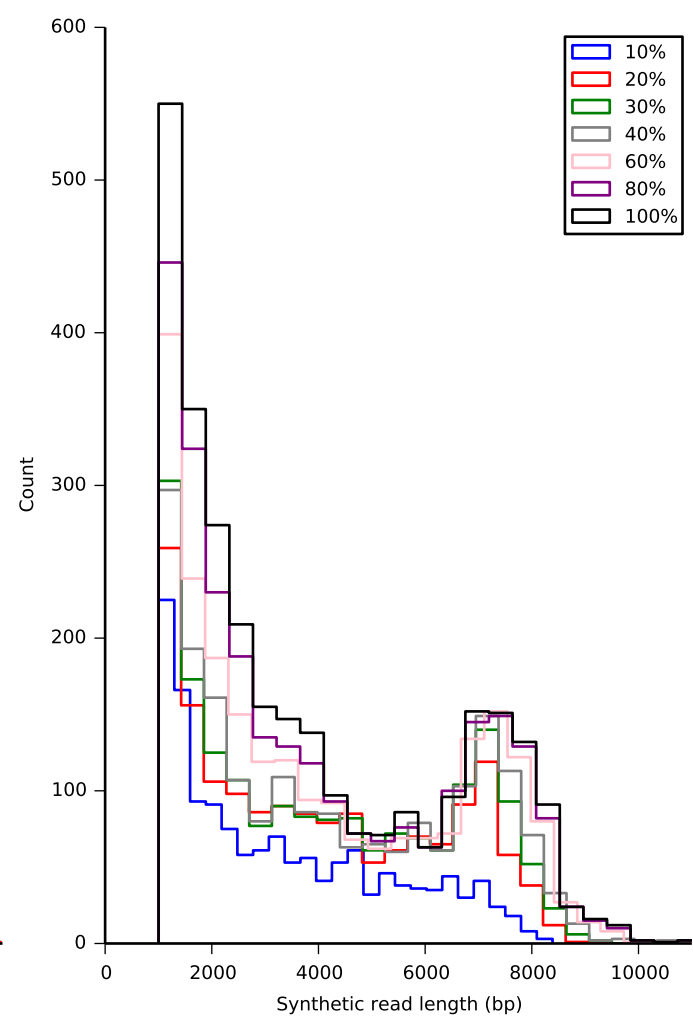

Supplement: Supplementary file 1 [file 1 › S4_Fig.pdf]

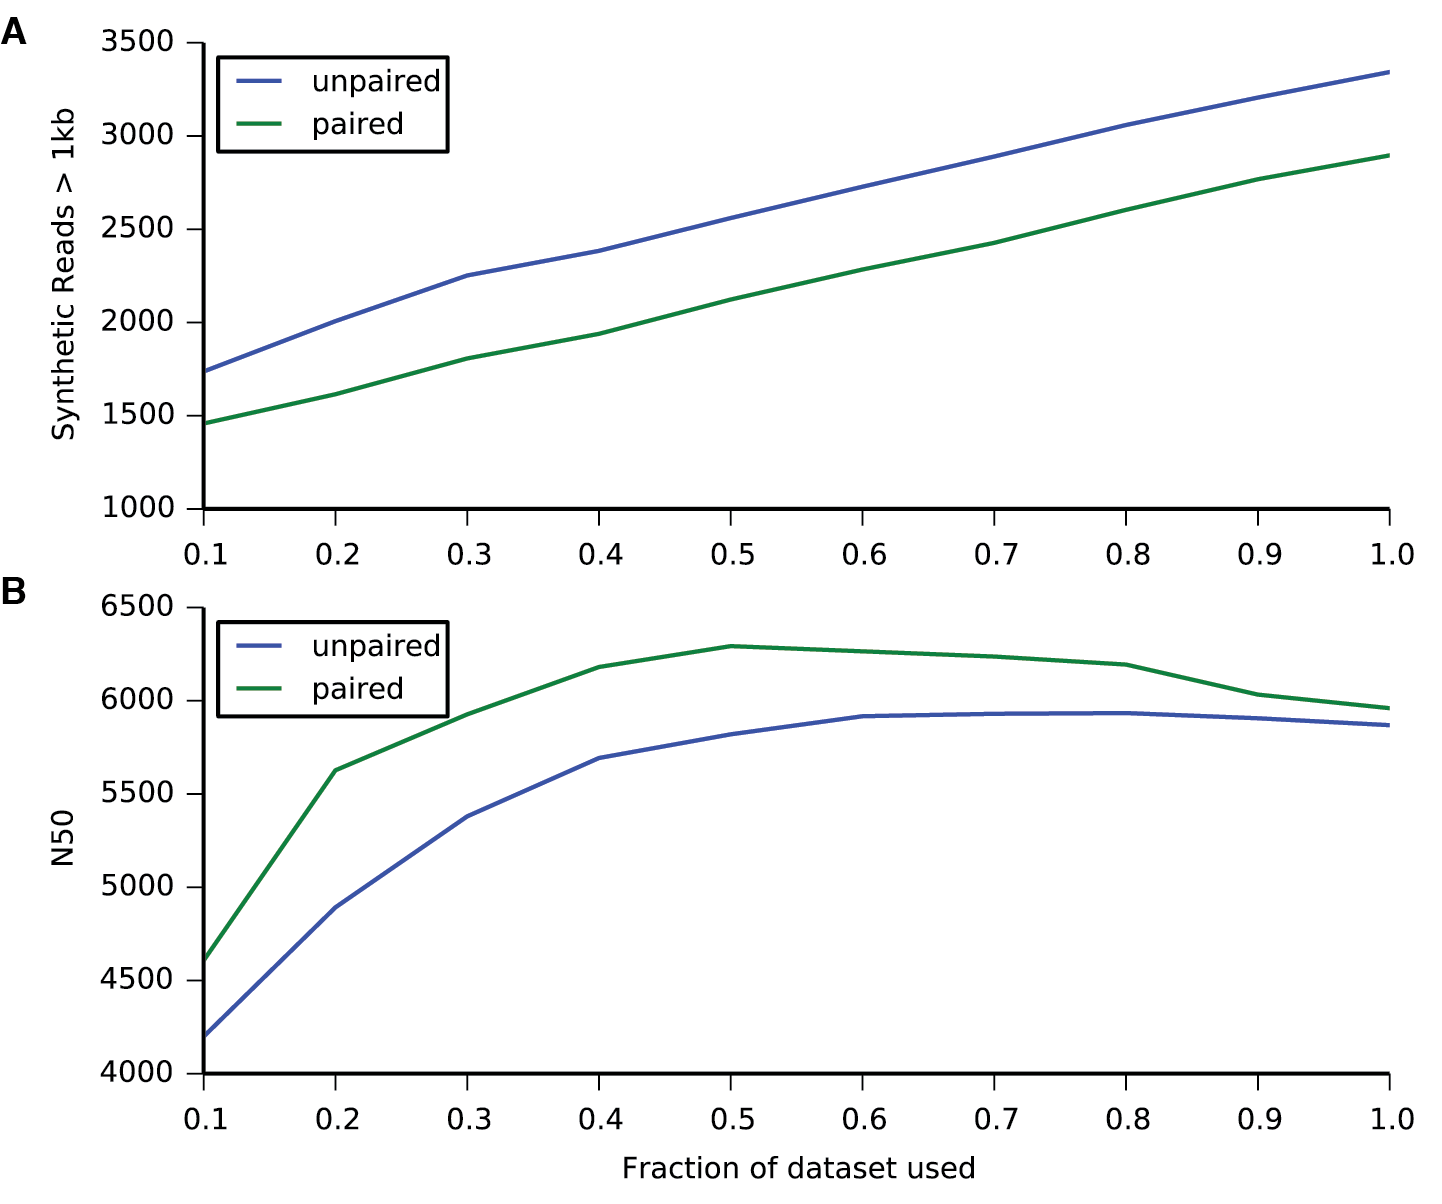

Supplement: Supplementary file 1 [file 1 › S5_Fig.png]

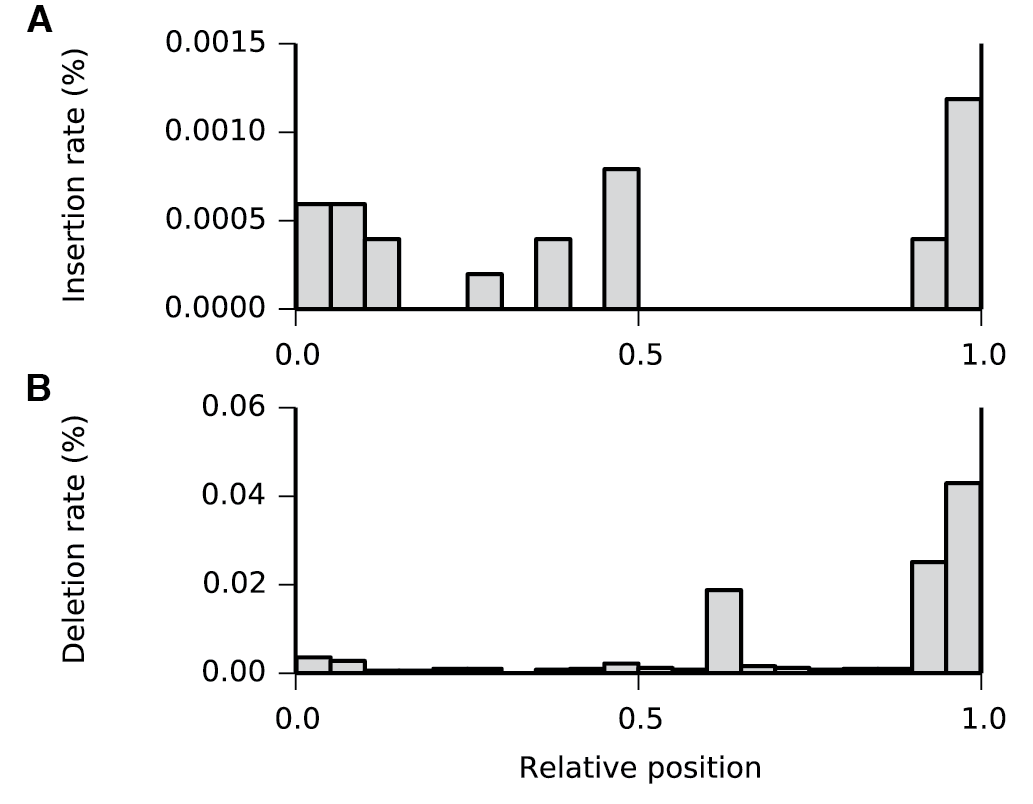

Supplement: Supplementary file 1 [file 1 › S6_Fig.png]

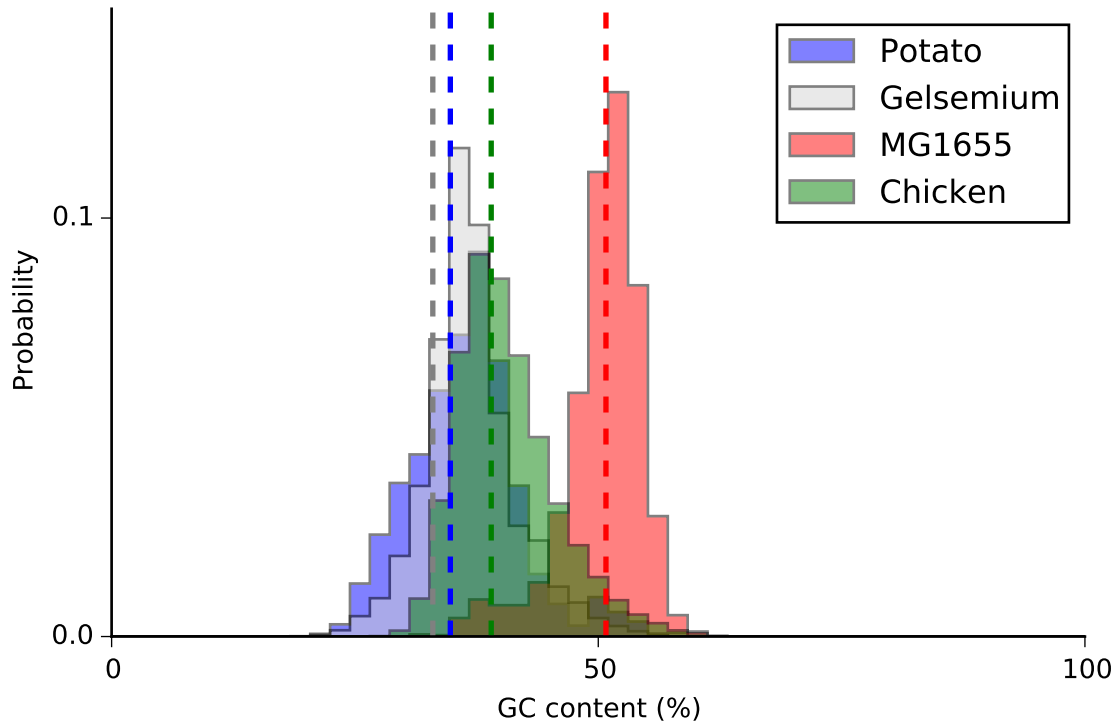

Supplement: Supplementary file 1 [file 1 › S7_Fig.pdf]

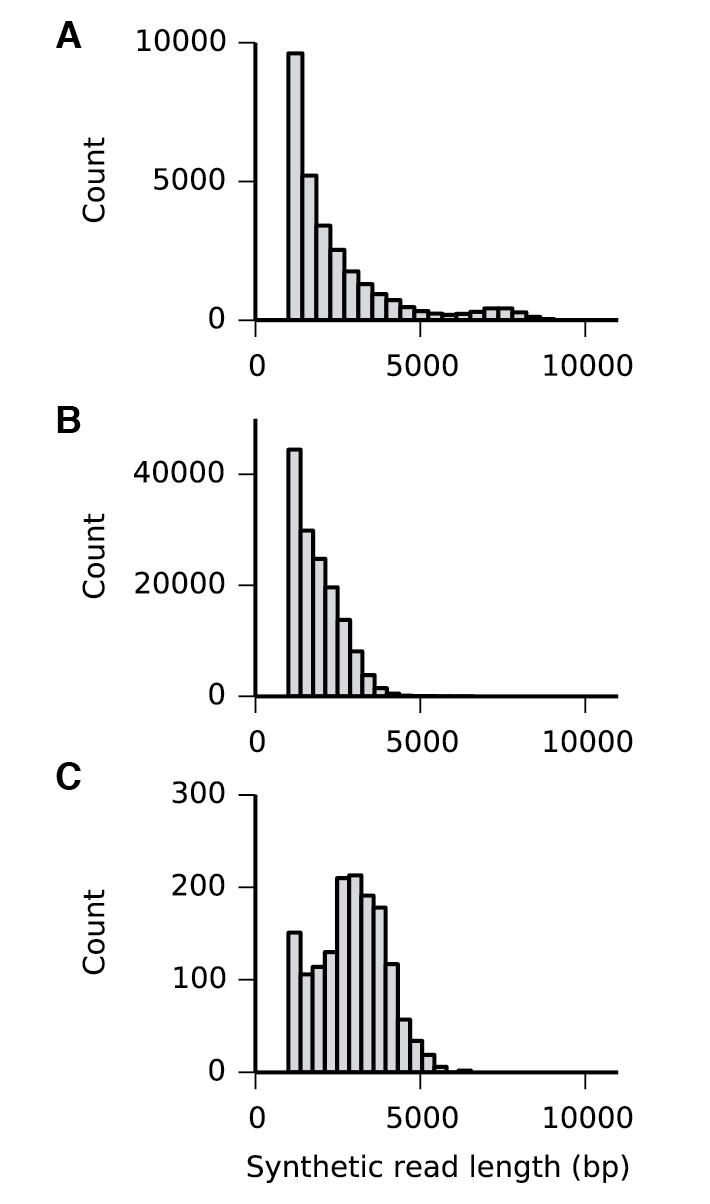

Supplement: Supplementary file 1 [file 1 › S8_Fig.png]

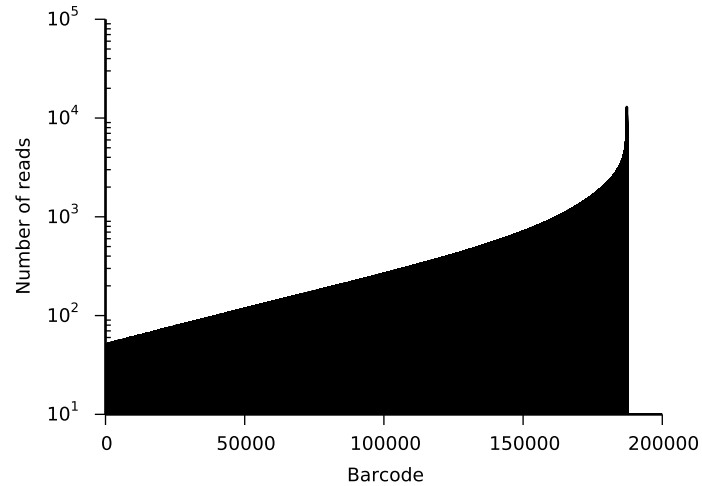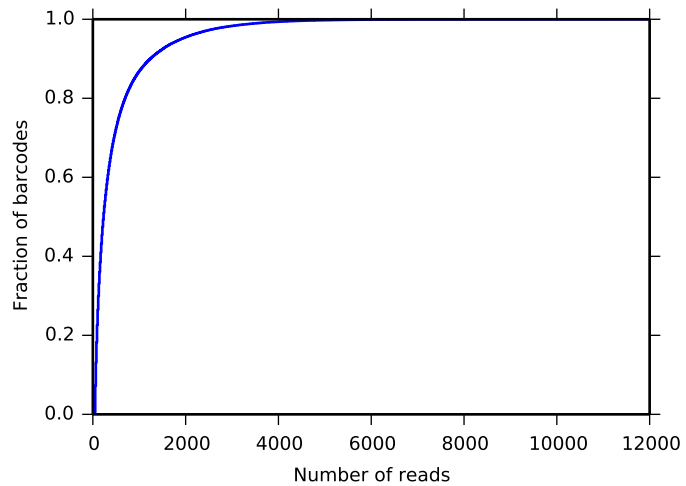

Supplement: Supplementary file 1 [file 1 › S9_Fig.pdf]

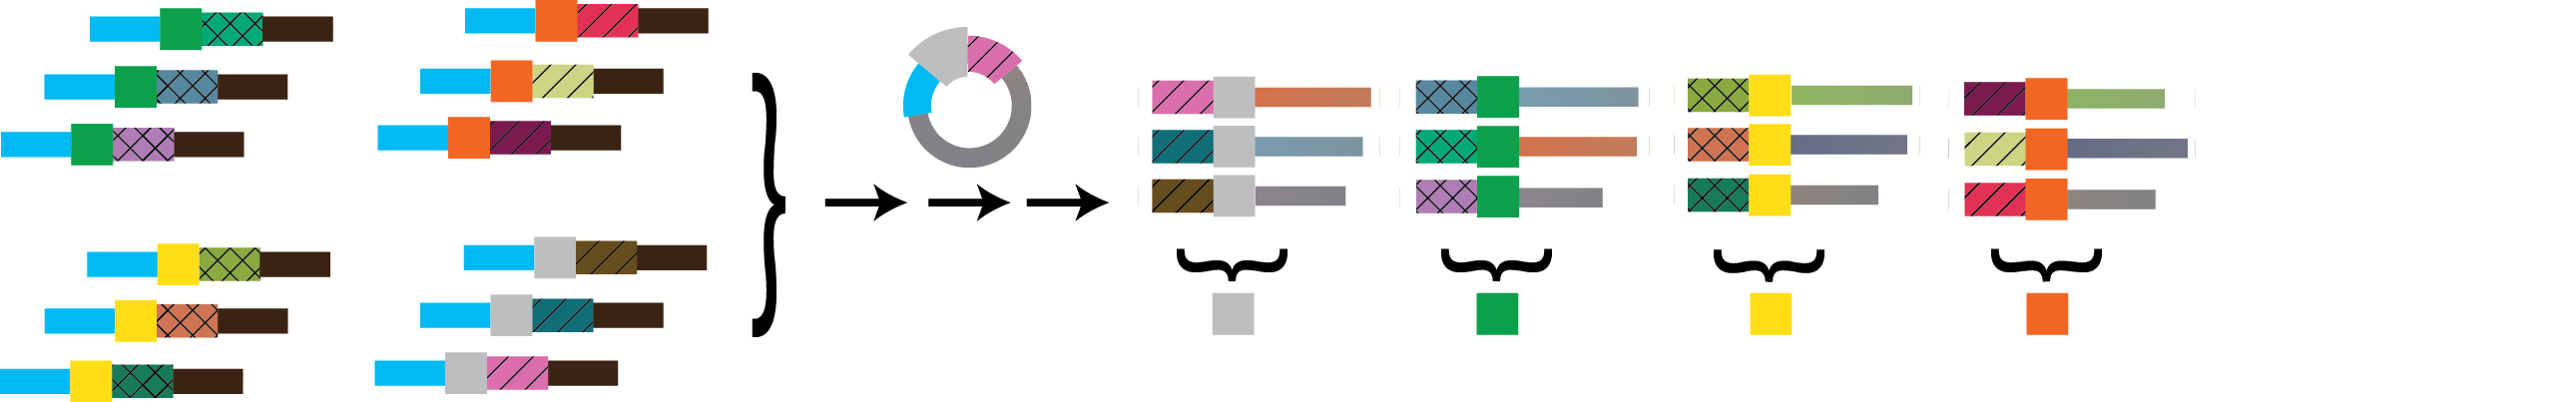

Supplement: Supplementary file 1 [file 1 › S10_Fig.png]

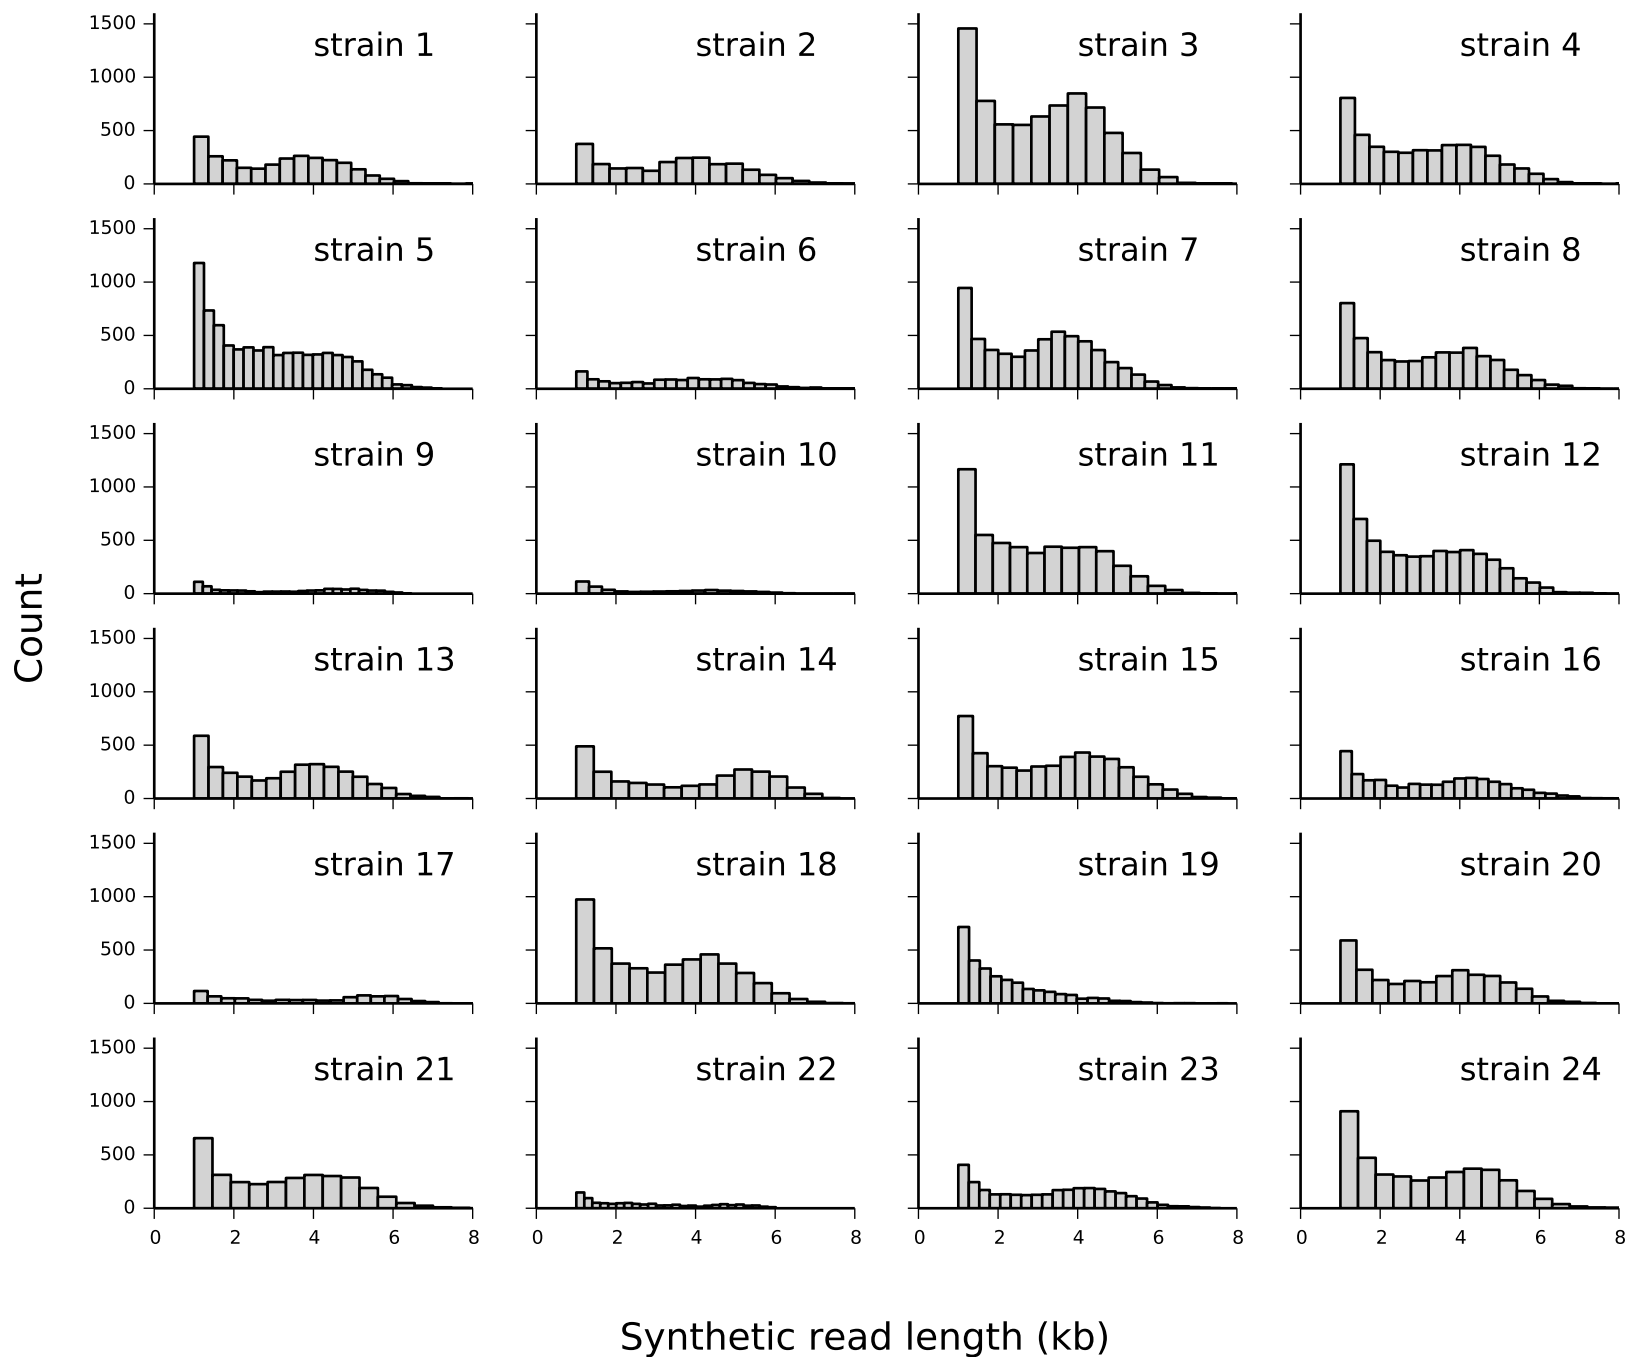

Supplement: Supplementary file 1 [file 1 › S11_Fig.pdf]

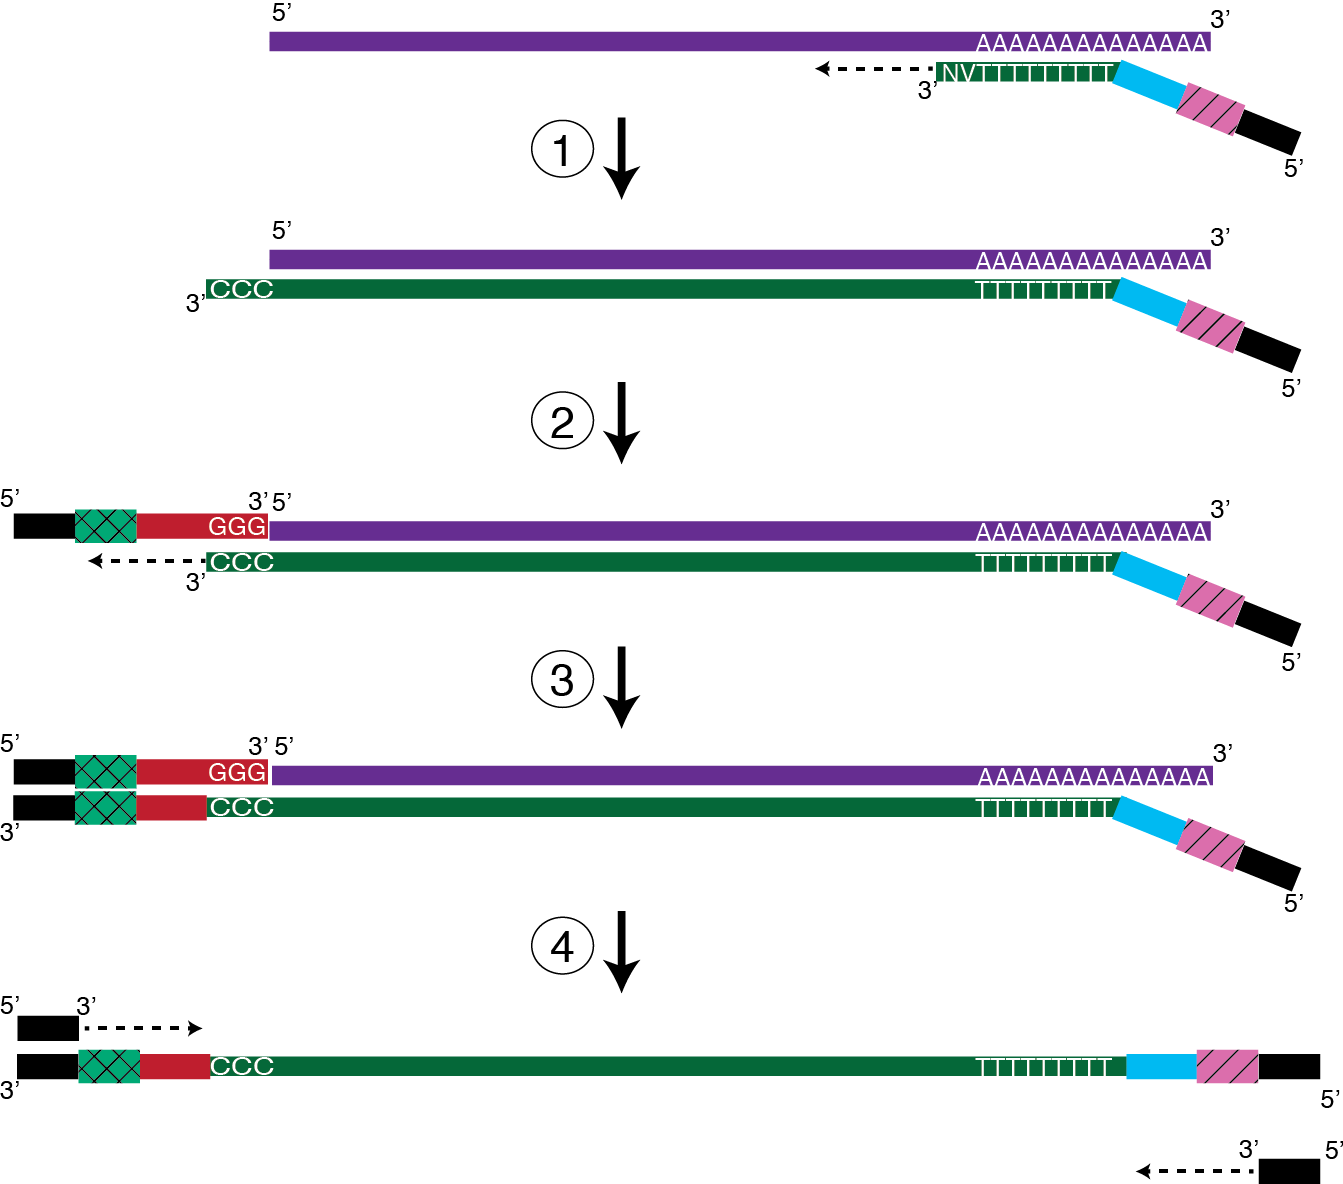

Supplement: Supplementary file 1 [file 1 › S12_Fig.png]

Junctions spanned

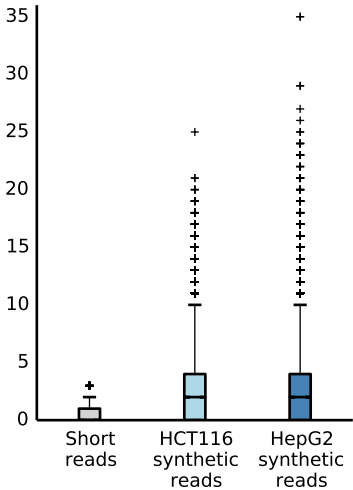

Supplement: Supplementary file 1 [file 1 › S13_Fig.pdf]

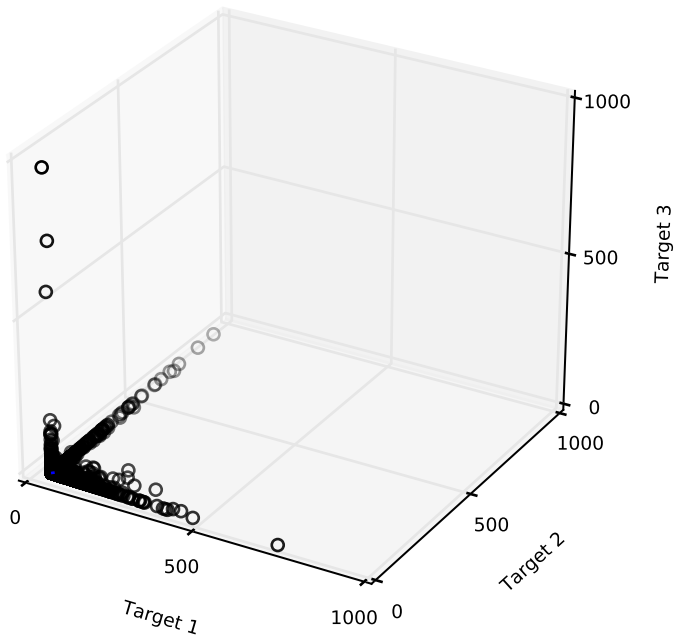

Supplement: Supplementary file 1 [file 1 › S15_Fig.pdf]

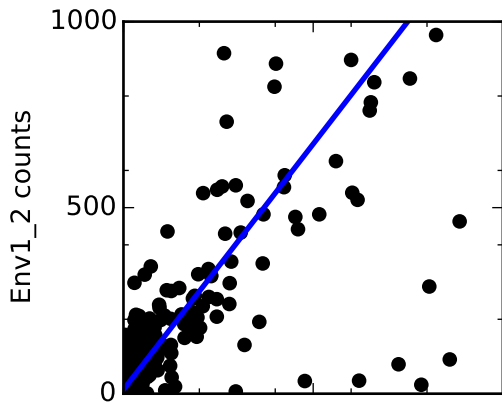

$\text{Env1\_2} = 11.06 + 1.32 \cdot \text{Env1\_1}$   
P-value < 0.000001  
 $R^2 = 0.887$

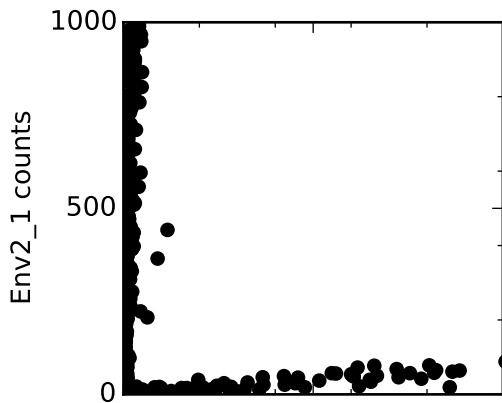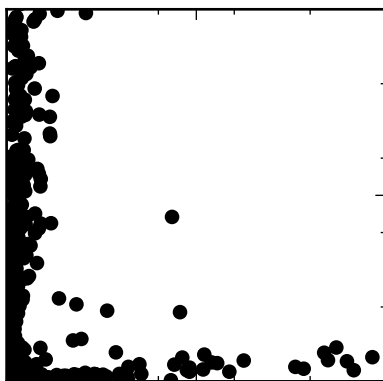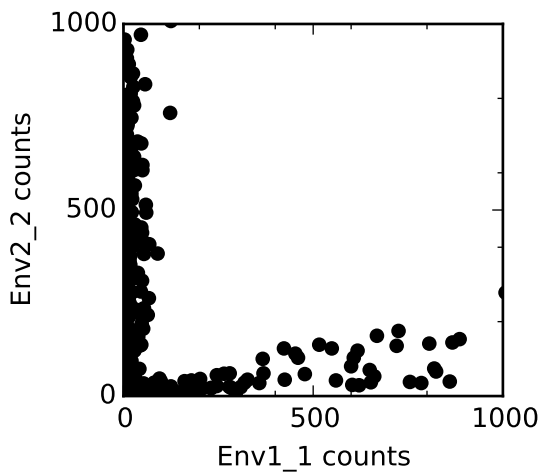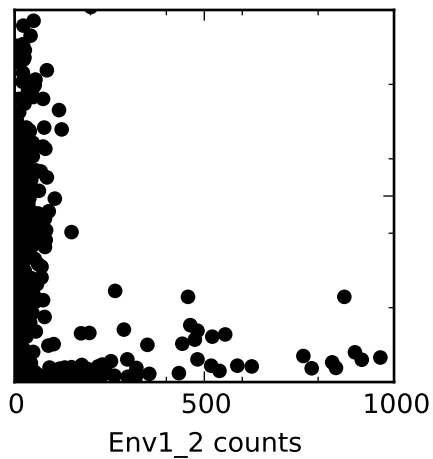

$\text{Env2\_2} = 152.23 + 1.24 \cdot \text{Env2\_1}$   
P-value < 0.000001  
 $R^2 = 0.312$

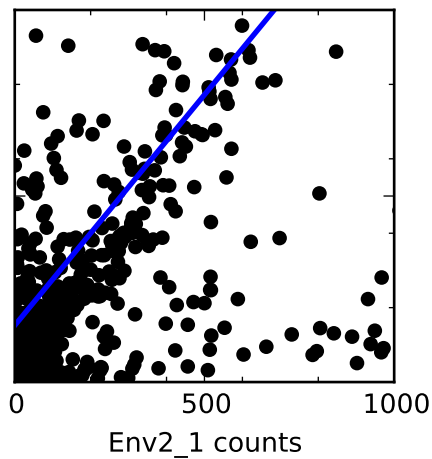

Supplement: Supplementary file 1 [file 1 › S16_Fig.pdf]
